# Supplementary material for: Effects of intensity and training on cardiovascular responses to the Valsalva maneouvre
Source: publisher site journal article supplement (doi:10.1515/jbcpp-2022-0029), 2022-11-09
Supplement: Supplementary file 1 [file j_jbcpp-2022-0029_suppl_002.docx]

**Table S2.** Expiratory pressure and cardiovascular responses during Phases I-IV of each VM trial in controls.

| Variable-Group | VM Phase | VM1-30 | VM2-30 | VM3-30 | VM4-30 | VM1-50 | VM2-50 | VM3-50 | VM4-50 |
| --- | --- | --- | --- | --- | --- | --- | --- | --- | --- |
| EP (mm Hg) |  | 23 (5) | 24 (5) | 24 (4) | 24 (4) | 33 (8) | 36 (5) | 37 (5) | 37 (5) |
| EP (% max) |  | 30 (4) | 31 (4) | 30 (4) | 31 (4) | 42 (10) | 46 (2) | 46 (2) | 46 (2) |
| HR | I | 12.7 (10.3) | 4.3 (4.9) | 12.5 (5.1) | 11.5 (6.0) | 9.3 (10.3) | 11.7 (11.4) | -0.3 (12.6) | -2.3 (14.7) |
|  | II | 20.2 (13.6) | 15.5 (2.9) | 17.3 (5.8) | 15.2 (7.5) | 24.8 (13.2) | 26.8 (19.7) | 28.7 (17.0) | 29.2 (16.4) |
|  | III | 16.2 (13.1) | 15.2 (9.6) | 15.7 (18.9) | 12.3 (14.4) | 58.7 (40.1) | 11.5 (11.9) | 15.5 (25.4) | 7.2 (23.4) |
|  | IV | 31.5 (13.9) | 38.9 (20.0) | 35.8 (26.9) | 27.2 (5.0) | 41.8 (12.1) | 38.2 (11.0) | 43.0 (22.3) | 30.8 (14.5) |
| SBP | I | 14.3 (8.2) | 15.5 (10.7) | 14.7 (6.1) | 17.0 (11.7) | 22.3 (12.7) | 20.0 (12.6) | 26.8 (15.9) | 25.3 (10.3) |
|  | II | 28.5 (20.0) | 31.5 (17.3) | 24.8 (16.4) | 27.7 (26.6) | 36.8 (32.6) | 36.5 (24.9) | 36.3 (31.8) | 34.7 (25.5) |
|  | III | -13.7 (21.7) | -16.5 (21.0) | -23.3 (18.2) | -20.2 (27.4) | -24.7 (19.0) | -14.2 (17.6) | -24.0 (23.2) | -23.3 (14.2) |
|  | IV | 34.5 (15.4) | 42.3 (17.9) | 33.8 (12.5) | 38.2 (11.7) | 42.5 (9.8) | 36.2 (15.3) | 46.5 (16.9) | 38.0 (10.0) |
| DBP | I | 16.7 (7.6) | 15.0 (9.3) | 13.5 (3.9) | 14.7 (6.6) | 21.5 (14.7) | 25.7 (16.3) | 24.5 (9.9) | 24.7 (13.5) |
|  | II | 18.3 (6.6) | 18.0 (6.0) | 16.0 (3.3) | 14.0 (2.6) | 22.3 (4.4) | 24.8 (7.5) | 21.3 (5.5) | 20.2 (8.9) |
|  | III | -14.3 (14.4) | -17.7 (9.1) | -21.5 (7.9) | -19.2 (11.7) | -20.0 (19.3) | -21.8 (25.4) | -31.0 (16.7) | -24.2 (4.5) |
|  | IV | 22.3 (3.7) | 25.2 (5.9) | 18.3 (8.1) | 20.3 (6.8) | 24.5 (9.8) | 25.3 (16.7) | 27.3 (10.9) | 22.2 (8.5) |
