# Supplementary material for: Effects of intensity and training on cardiovascular responses to the Valsalva maneouvre
Source: publisher site journal article supplement (doi:10.1515/jbcpp-2022-0029), 2022-11-09
Supplement: Supplementary file 2 [file j_jbcpp-2022-0029_suppl_003.docx]

**Table S3.** Correlation coefficients related to relationships between expiratory pressure (mm Hg) and cardiovascular responses during Valsalva maneouvres at 30 %EPmax (n = 14) and 50 EPmax (n = 14). For each cardiovascular variable the phase number is shown as a Roman numeral (I-IV).

|  | 30 %EPmax  (mm Hg) | 50 %EPmax  (mm Hg) |  |  |  |
| --- | --- | --- | --- | --- | --- |
| HR I | 0.40 | 0.77* |  |  |  |
| HR II | 0.84* | 0.82* |  |  |  |
| HR III | -0.46 | -0.24 |  |  |  |
| HR IV | 0.70* | 0.69* |  |  |  |
| SBP I | 0.47 | 0.52 |  |  |  |
| SBP II | 0.59* | 0.53* |  |  |  |
| SBP III | 0.37 | 0.35 |  |  |  |
| SBP IV | 0.59* | 0.53* |  |  |  |
| DBP I | 0.52 | 0.38 |  |  |  |
| DBP II | 0.77* | 0.74* |  |  |  |
| DBP III | -0.05 | -0.02 |  |  |  |
| DBP IV | 0.66* | 0.21 |  |  |  |
| HR/SBP I | 0.14 | 0.63* |  |  |  |
| HR/SBP II | 0.25 | 0.17 |  |  |  |
| HR/SBP III | 0.13 | -0.08 |  |  |  |
| HR/SBP IV | 0.18 | 0.18 |  |  |  |
| HR/SBP I | 0.05 | 0.38 |  |  |  |
| HR/SBP II | 0.40 | 0.52 |  |  |  |
| HR/SBP III | 0.37 | 0.37 |  |  |  |
| HR/SBP IV | 0.26 | 0.30 |  |  |  |

* significant at P ≤ 0.05
